# Supplementary material for: Geospatial Analysis of Opioid Dispensing Patterns in California: A 2021 Real-World Study
Source: Healthcare (Basel). 2023 Jun 13;11(12):1732. doi: 10.3390/healthcare11121732 (PMC10298226; doi:10.3390/healthcare11121732)

## Supplementary Materials

### Geospatial Analysis of Opioid Dispensing Patterns in California: A 2021 Real World Study

#### 1. Variables

**Table S1: Variables and their descriptions**

| Variable                       | Description                                                                             |
|--------------------------------|-----------------------------------------------------------------------------------------|
| Median Age                     | The median age of residents in the zip code.                                            |
| % Charitable Givers            | The percentage of households reporting charitable giving on their 2016 tax return.      |
| Median Commute Time            | The median commute time of resident workers in minutes.                                 |
| Density                        | The estimated population per square kilometer.                                          |
| % Disabled                     | The percentage of residents who report a disability.                                    |
| % Divorced                     | The percentage of residents divorced.                                                   |
| % Education Bachelors          | The percentage of residents with a bachelor's degree (or equivalent) but no more.       |
| % Education College or Above   | The percentage of residents with at least a 4-year degree.                              |
| % Education Graduate           | The percentage of residents with a graduate degree.                                     |
| % Education Highschool         | The percentage of residents with a high school diploma but no more.                     |
| % Education Less Highschool    | The percentage of residents with less than a high school education.                     |
| % Education Some College       | The percentage of residents with some college but no more.                              |
| % Family Dual Income           | The percentage of families with dual income earners.                                    |
| Average Family Size            | The average size of resident families.                                                  |
| % Farmer                       | The percentage of households reporting farm income on their 2016 IRS tax return.        |
| % Health Uninsured             | The percentage of residents who report not having health insurance.                     |
| % Hispanic                     | The percentage of residents who report being Hispanic.                                  |
| % Home Ownership               | Percentage of households that own (rather than rent) their residence.                   |
| Median Home Value              | The median value of homes that are owned by residents.                                  |
| Housing Units                  | The number of housing units (or households) in the zip code.                            |
| % Income Household \$150K Over | The percentage of households with income over \$150,000.                                |
| Median Household Income        | Median household income in USD.                                                         |
| % Household Income Under \$5K  | The percentage of households with income under \$5,000.                                 |
| Median Individual Income       | The median income of individuals in the zip code.                                       |
| % Labor Force Participation    | The percentage of residents 16 and older in the labor force.                            |
| % Limited English              | The percentage of residents who only speak limited English.                             |
| % Male                         | The percentage of residents who report being male.                                      |
| % Married                      | The percentage of residents who report being married.                                   |
| % Never Married                | The percentage of residents never married.                                              |
| Population                     | An estimate of the zip code's population.                                               |
| % Race Asian                   | The percentage of residents who report their race as Asian.                             |
| % Race Black                   | The percentage of residents who report their race as Black or African American.         |
| % Race Native                  | The percentage of residents who report their race as American Indian and Alaska Native. |

|                    |                                                                                                  |
|--------------------|--------------------------------------------------------------------------------------------------|
| % Race Other       | The percentage of residents who report their race as Some other race.                            |
| % Race Pacific     | The percentage of residents who report their race as Native Hawaiian and Other Pacific Islander. |
| % Race White       | The percentage of residents who report their race White.                                         |
| Median Rent Burden | The median rent as a percentage of the median renter's household income.                         |
| Median Rent        | The median rent paid by renters.                                                                 |
| % Self Employed    | The percentage of households reporting self-employment income on their 2016 IRS tax return.      |
| Unemployment Rate  | The percentage of residents unemployed.                                                          |
| % Veteran          | The percentage of residents who are veterans.                                                    |

## 2. Model Specifications:

### 2.1 Multiple provider episodes

#### Model:

```
glm(formula = overlap_prescriber ~ density + age_median + male +
  married + never_married + income_household_median + income_household_150_over +
  income_individual_median + home_ownership + housing_units +
  home_value + education_less_highschool + education_highschool +
  education_some_college + education_graduate + unemployment_rate +
  farmer + race_asian + race_native + race_pacific + race_other +
  hispanic + health_uninsured + charitable_givers, data = na.omit(df_merge))
```

#### Coefficients:

| Variable                       | Estimate | Std. Error | t Value | Pr(> t ) |     |
|--------------------------------|----------|------------|---------|----------|-----|
| (Intercept)                    | 508.800  | 226.400    | 2.248   | 0.025    | *   |
| Density                        | -0.027   | 0.004      | -7.150  | 0.000    | *** |
| Median Age                     | -5.562   | 1.521      | -3.656  | 0.000    | *** |
| % Male                         | -7.593   | 1.949      | -3.896  | 0.000    | *** |
| % Married                      | -8.721   | 1.803      | -4.836  | 0.000    | *** |
| % Never Married                | -8.163   | 2.033      | -4.015  | 0.000    | *** |
| Median Household Income        | 0.002    | 0.001      | 2.101   | 0.036    | *   |
| % Income Household \$150K Over | 3.793    | 1.705      | 2.225   | 0.026    | *   |
| Median Individual Income       | -0.002   | 0.001      | -1.715  | 0.087    | .   |
| % Home Ownership               | 1.388    | 0.736      | 1.887   | 0.059    | .   |
| Housing Units                  | 0.057    | 0.001      | 54.791  | 0.000    | *** |
| Median Home Value              | 0.000    | 0.000      | -2.215  | 0.027    | *   |
| % Education Less Highschool    | 12.030   | 1.626      | 7.401   | 0.000    | *** |
| % Education Highschool         | 10.710   | 1.558      | 6.876   | 0.000    | *** |
| % Education Some College       | 10.750   | 1.652      | 6.509   | 0.000    | *** |
| % Education Graduate           | 3.264    | 1.847      | 1.768   | 0.077    | .   |
| Unemployment Rate              | -3.817   | 1.920      | -1.988  | 0.047    | *   |
| % Farmer                       | -11.210  | 3.537      | -3.169  | 0.002    | **  |
| % Race Asian                   | -5.545   | 0.573      | -9.678  | 0.000    | *** |
| % Race Native                  | -4.261   | 1.951      | -2.184  | 0.029    | *   |
| % Race Pacific                 | 54.950   | 11.770     | 4.669   | 0.000    | *** |

|                     |        |       |        |       |     |
|---------------------|--------|-------|--------|-------|-----|
| % Race Other        | -1.596 | 0.825 | -1.935 | 0.053 | .   |
| % Hispanic          | -2.847 | 0.680 | -4.187 | 0.000 | *** |
| % Health Uninsured  | -9.388 | 2.150 | -4.366 | 0.000 | *** |
| % Charitable Givers | 3.068  | 1.251 | 2.453  | 0.014 | *   |

Significance codes: 0 '\*\*\*' 0.001 '\*\*' 0.01 '\*' 0.05 '.' 0.1 ' ' 1

## 2.2 Overlapping opioid prescription for $\geq 7$ days

### Model:

```
glm(formula = IsoverlapOpioid ~ population + density + age_median +
  married + never_married + income_household_150_over + income_individual_median +
  home_ownership + housing_units + home_value + rent_burden +
  education_less_highschool + education_bachelors + education_graduate +
  labor_force_participation + farmer + race_white + race_asian +
  race_pacific + hispanic + disabled + health_uninsured + charitable_givers,
  data = na.omit(df_merge))
```

### Coefficients:

| Variable                       | Estimate | Std. Error | t Value | Pr(> t ) |     |
|--------------------------------|----------|------------|---------|----------|-----|
| (Intercept)                    | 834.900  | 143.400    | 5.821   | 0.000    | *** |
| Population                     | -0.001   | 0.001      | -1.761  | 0.078    | .   |
| Density                        | -0.013   | 0.003      | -5.196  | 0.000    | *** |
| Median Age                     | -6.720   | 1.033      | -6.505  | 0.000    | *** |
| % Married                      | -4.752   | 1.246      | -3.813  | 0.000    | *** |
| % Never Married                | -5.753   | 1.340      | -4.292  | 0.000    | *** |
| % Income Household \$150K Over | 2.025    | 0.908      | 2.232   | 0.026    | *   |
| Median Individual Income       | -0.001   | 0.001      | -1.744  | 0.081    | .   |
| % Home Ownership               | 0.664    | 0.469      | 1.416   | 0.157    |     |
| Housing Units                  | 0.036    | 0.003      | 13.662  | 0.000    | *** |
| Median Home Value              | 0.000    | 0.000      | -1.657  | 0.098    | .   |
| Median Rent Burden             | -0.826   | 0.532      | -1.554  | 0.120    |     |
| % Education Less Highschool    | -1.493   | 0.862      | -1.732  | 0.083    | .   |
| % Education Bachelors          | -6.076   | 0.970      | -6.266  | 0.000    | *** |
| % Education Graduate           | -4.213   | 0.864      | -4.878  | 0.000    | *** |
| % Labor Force Participation    | -1.223   | 0.778      | -1.572  | 0.116    |     |
| % Farmer                       | -8.295   | 2.359      | -3.516  | 0.000    | *** |
| % Race White                   | 1.425    | 0.404      | 3.532   | 0.000    | *** |
| % Race Asian                   | -1.825   | 0.550      | -3.316  | 0.001    | *** |
| % Race Pacific                 | 15.630   | 7.929      | 1.971   | 0.049    | *   |
| % Hispanic                     | -0.886   | 0.436      | -2.030  | 0.043    | *   |
| % Disabled                     | 2.087    | 1.442      | 1.447   | 0.148    |     |
| % Health Uninsured             | -4.329   | 1.429      | -3.030  | 0.002    | **  |
| % Charitable Givers            | 4.039    | 0.858      | 4.709   | 0.000    | *** |

Significance codes: 0 '\*\*\*' 0.001 '\*\*' 0.01 '\*' 0.05 '.' 0.1 ' ' 1

### 2.3 Overlapping opioid and benzodiazepine for $\geq 7$ days

#### Model:

```
glm(formula = IsoverlapOpioidBenzo ~ population + density + age_median +
  male + married + never_married + income_individual_median +
  housing_units + rent_burden + education_less_highschool +
  education_bachelors + education_graduate + labor_force_participation +
  self_employed + farmer + race_black + race_asian + race_native +
  race_other + disabled + commute_time + health_uninsured +
  veteran + charitable_givers, data = na.omit(df_merge))
```

#### Coefficients:

| Variable                    | Estimate | Std. Error | t Value | Pr(> t ) |     |
|-----------------------------|----------|------------|---------|----------|-----|
| (Intercept)                 | 1556.000 | 227.000    | 6.854   | 0.000    | *** |
| Population                  | -0.006   | 0.001      | -4.918  | 0.000    | *** |
| Density                     | -0.019   | 0.004      | -4.942  | 0.000    | *** |
| Median Age                  | -7.747   | 1.599      | -4.845  | 0.000    | *** |
| % Male                      | -3.130   | 2.090      | -1.498  | 0.134    |     |
| % Married                   | -5.396   | 1.981      | -2.724  | 0.007    | **  |
| % Never Married             | -6.671   | 2.231      | -2.990  | 0.003    | **  |
| Median Individual Income    | -0.003   | 0.001      | -3.134  | 0.002    | **  |
| Housing Units               | 0.065    | 0.004      | 16.592  | 0.000    | *** |
| Median Rent Burden          | -2.440   | 0.860      | -2.839  | 0.005    | **  |
| % Education Less Highschool | -3.906   | 1.255      | -3.111  | 0.002    | **  |
| % Education Bachelors       | -9.884   | 1.525      | -6.483  | 0.000    | *** |
| % Education Graduate        | -8.296   | 1.310      | -6.332  | 0.000    | *** |
| % Labor Force Participation | -2.642   | 1.231      | -2.146  | 0.032    | *   |
| % Self Employed             | 4.537    | 1.729      | 2.623   | 0.009    | **  |
| % Farmer                    | -12.630  | 3.728      | -3.388  | 0.001    | *** |
| % Race Black                | -5.359   | 1.021      | -5.247  | 0.000    | *** |
| % Race Asian                | -4.385   | 0.590      | -7.432  | 0.000    | *** |
| % Race Native               | -4.888   | 2.046      | -2.389  | 0.017    | *   |
| % Race Other                | -2.923   | 0.794      | -3.683  | 0.000    | *** |
| % Disabled                  | 5.230    | 2.308      | 2.266   | 0.024    | *   |
| Median Commute Time         | -2.229   | 1.053      | -2.118  | 0.034    | *   |
| % Health Uninsured          | -5.722   | 2.304      | -2.484  | 0.013    | *   |
| % Veteran                   | -11.500  | 3.134      | -3.669  | 0.000    | *** |
| % Charitable Givers         | 10.750   | 1.240      | 8.674   | 0.000    | *** |

Significance codes: 0 '\*\*\*' 0.001 '\*\*' 0.01 '\*' 0.05 '.' 0.1 ' ' 1

## 2.4 High standardized dosage of opioid prescriptions

### Model:

```
glm(formula = IshighMME ~ population + age_median + married +
  never_married + income_household_150_over + income_individual_median +
  home_ownership + housing_units + education_highschool + education_bachelors +
  education_graduate + self_employed + farmer + race_asian +
  race_native + race_pacific + hispanic + disabled + limited_english +
  commute_time + health_uninsured, data = na.omit(df_merge))
```

### Coefficients:

| Variable                       | Estimate | Std. Error | t Value | Pr(> t ) |     |
|--------------------------------|----------|------------|---------|----------|-----|
| (Intercept)                    | 286.700  | 60.020     | 4.777   | 0.000    | *** |
| Population                     | -0.001   | 0.000      | -3.802  | 0.000    | *** |
| Median Age                     | -1.776   | 0.453      | -3.916  | 0.000    | *** |
| % Married                      | -1.376   | 0.573      | -2.403  | 0.016    | *   |
| % Never Married                | -1.700   | 0.609      | -2.791  | 0.005    | **  |
| % Income Household \$150K Over | 1.744    | 0.363      | 4.800   | 0.000    | *** |
| Median Individual Income       | 0.000    | 0.000      | -1.539  | 0.124    |     |
| % Home Ownership               | 0.468    | 0.188      | 2.490   | 0.013    | *   |
| Housing Units                  | 0.014    | 0.001      | 12.128  | 0.000    | *** |
| % Education Highschool         | -0.997   | 0.460      | -2.166  | 0.031    | *   |
| % Education Bachelors          | -2.682   | 0.467      | -5.746  | 0.000    | *** |
| % Education Graduate           | -1.996   | 0.417      | -4.786  | 0.000    | *** |
| % Self Employed                | 0.839    | 0.483      | 1.737   | 0.083    | .   |
| % Farmer                       | -2.730   | 1.069      | -2.555  | 0.011    | *   |
| % Race Asian                   | -1.272   | 0.186      | -6.826  | 0.000    | *** |
| % Race Native                  | -0.994   | 0.586      | -1.696  | 0.090    | .   |
| % Race Pacific                 | 7.184    | 3.574      | 2.010   | 0.045    | *   |
| % Hispanic                     | -0.632   | 0.175      | -3.614  | 0.000    | *** |
| % Disabled                     | 1.202    | 0.635      | 1.893   | 0.059    | .   |
| % Limited English              | -0.592   | 0.314      | -1.887  | 0.059    | .   |
| Median Commute Time            | -0.422   | 0.294      | -1.437  | 0.151    | .   |
| % Health Uninsured             | -2.329   | 0.658      | -3.541  | 0.000    | *** |

Significance codes: 0 '\*\*\*' 0.001 '\*\*' 0.01 '\*' 0.05 '.' 0.1 ' ' 1

### 3. QQ-Plots

**Figure S1: QQ-Plot of Overlapping Opioid Prescription for  $\geq 7$  Days:**

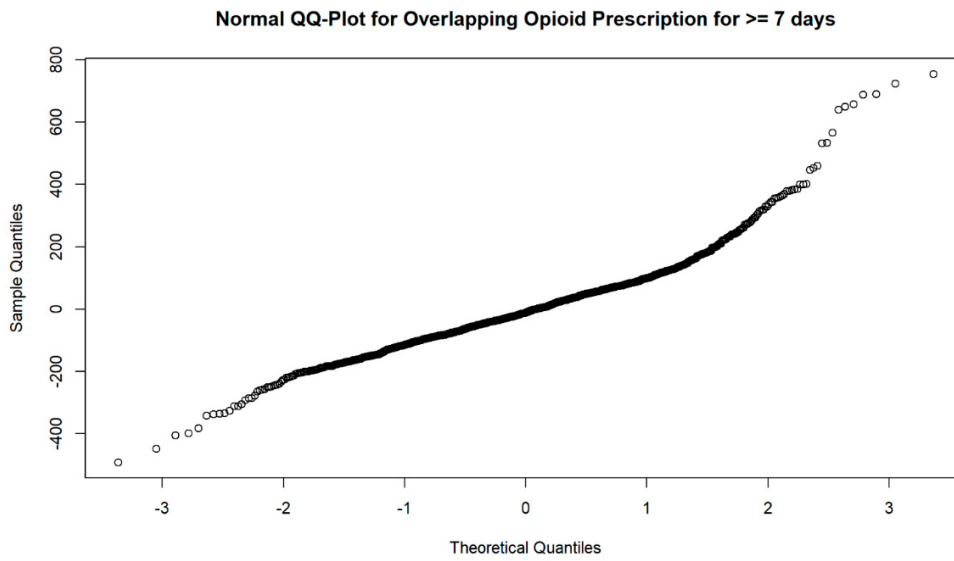

**Figure S2: QQ-Plot of Overlapping Opioid and Benzodiazepine for  $\geq 7$  days:**

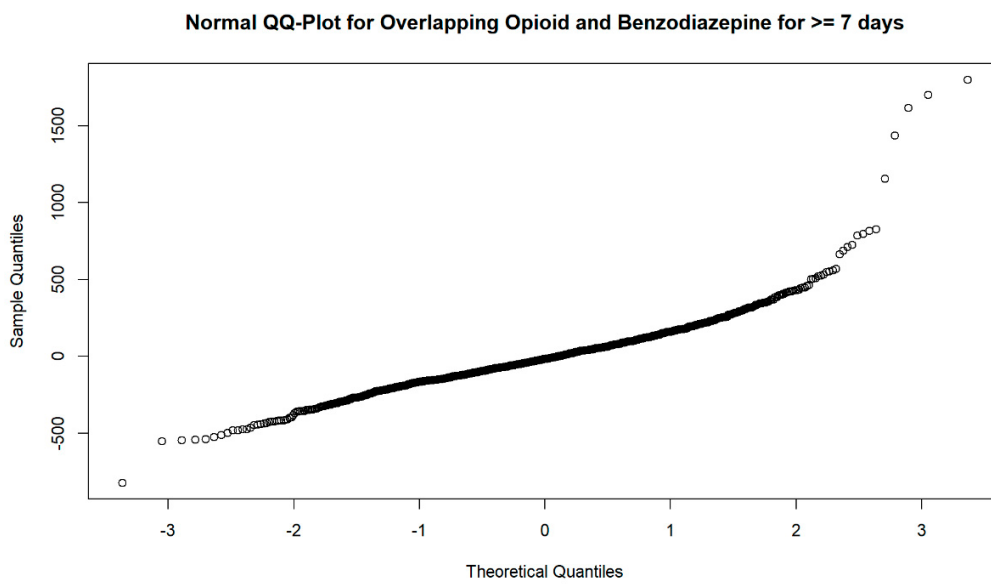

**Figure S3: QQ-Plot of Multiple Provider Episodes:**

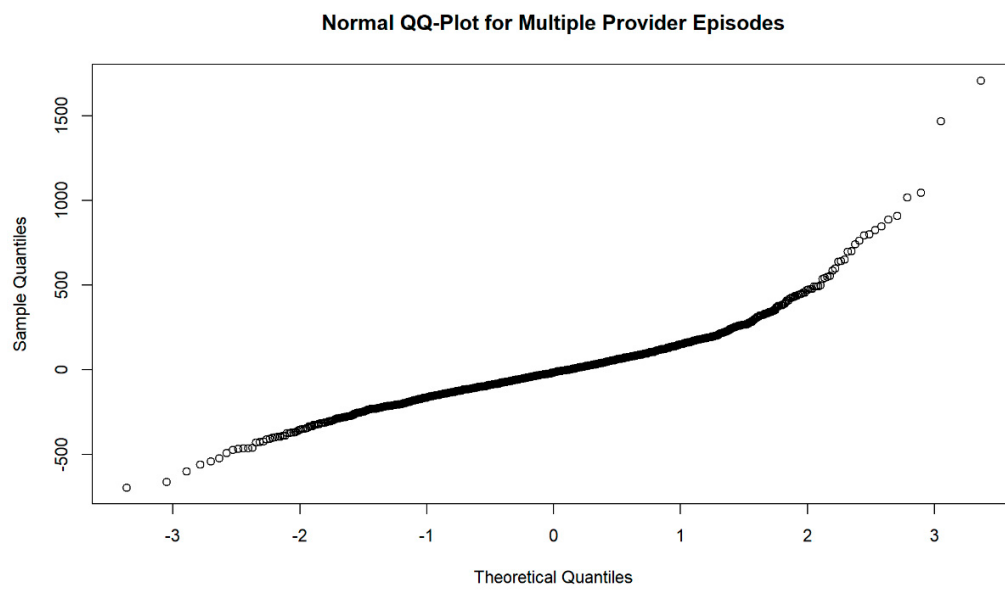

**Figure S4: QQ-Plot of High standardized Dosage of Opioid Prescriptions:**

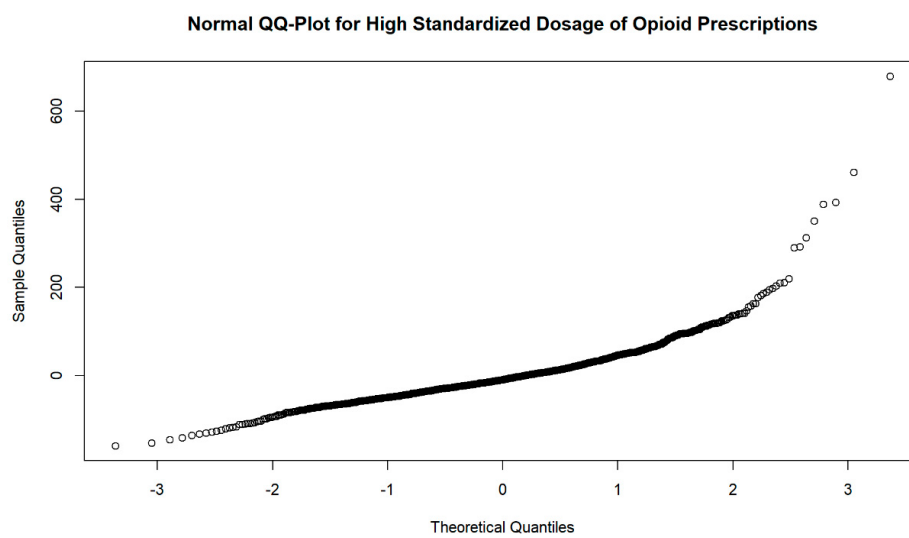

Supplement: Supplementary file 1 [file healthcare-11-01732-s001.zip › healthcare-2384924-supplementary.pdf]
